# Supplementary material
Source: MDPI journal article supplement (https://www.mdpi.com/2073-4441/10/11/1569)
Supplement: s1 [file s1]

## Supplementary Material

**Table S1.** Linear regression to predict lab-equivalent nitrate (as nitrate+nitrite minus nitrite) from field measurements of nitrate using the MABARI ISSUS nitrate probe.

| Date (n)             | Intercept | Slope | R <sup>2</sup> (p-value)    |
|----------------------|-----------|-------|-----------------------------|
| 23 May 2012 (21)     | 161       | 0.40  | 0.43 (<0.0012) <sup>a</sup> |
| 4 July 2012 (26)     | -16.1     | 0.64  | 0.83 (<0.001)               |
| 17 October 2012 (25) | -68.1     | 0.92  | 0.98 (<0.001)               |
| 25 April 2013 (29)   | -22.6     | 0.87  | 0.97 (<0.001)               |

Note: <sup>a</sup>, the reason for the poor correspondence between the field and lab data is unclear; examination of the distribution of the field and lab data supports the utility of the field data to represent spatial pattern.

**Table S2.** Upper water column average K<sub>660</sub> among sampling events when water column profiles were collected over the full extent of the study area in 2012 and 2013.

| Date (n)        | K <sub>660</sub> (/m) |        |    |
|-----------------|-----------------------|--------|----|
|                 | Mean (min-max)        | Median | n  |
| 22 May 2012     | 0.85 (0.72–1.02)      | 0.85   | 66 |
| 23 May 2012     | 0.85 (0.69–1.16)      | 0.83   | 28 |
| 3 July 2012     | 0.96 (0.78–1.69)      | 0.94   | 69 |
| 4 July 2012     | 1.21 (0.91–3.71)      | 1.04   | 35 |
| 12 October 2012 | 0.53 (0.42–1.00)      | 0.49   | 40 |
| 25 April 2013   | 0.89 (0.52–3.75)      | 0.64   | 31 |

**Table S3.** Percent SRP of DP immediately above the nearbed at varying distances along the WSW-ESE alongshore flow axis from the Duffins Creek WPCP outfall and the mouth of Duffins Creek.

| %SRP         | Depth (m) | Duffins Creek WPCP |                 |                 | Duffins Creek Mouth |                 |                | Offshore |
|--------------|-----------|--------------------|-----------------|-----------------|---------------------|-----------------|----------------|----------|
|              |           | WSW<br>(>1 km)     | WSW<br>(0–1 km) | ESE<br>(0–1 km) | ESE<br>(0–1 km)     | ESE<br>(1–2 km) | ESE<br>(>2 km) |          |
| May 2012     | <6        | 26                 | 37              |                 | 55                  | 18              | 45             |          |
|              | 6–10      |                    | 38              | 23              |                     | 64              | 13             |          |
|              | 20        |                    |                 |                 |                     |                 |                | 65       |
| June 2012    | <6        | 47                 | 47              |                 | 34                  | 56              | 42             |          |
|              | 6–10      |                    | 47              | 54              | 59                  |                 | 32             |          |
|              | 20        |                    |                 |                 |                     |                 |                | 61       |
| July 2012    | <6        | 5                  | 10              |                 | 41                  | 7               | 21             |          |
|              | 6–10      |                    | 12              | 10              | 83                  | 10              | 33             |          |
|              | 20        |                    |                 |                 |                     |                 |                | 28       |
| August 2012  | <6        | 21                 | 17              |                 | 21                  | 21              | 7              |          |
|              | 6–10      |                    | 27              | 36              | 31                  |                 | 6              |          |
|              | 20        |                    |                 |                 |                     |                 |                | 51       |
| October 2012 | <6        | 70                 | 70              |                 | 72                  | 12              | 59             |          |
|              | 6–10      | 35                 | 58              | 79              | 75                  | 80              | 74             |          |
|              | 20        |                    |                 |                 |                     |                 |                | 71       |
| June 2013    | <6        |                    | 22              |                 | 23                  | 37              | 52             |          |
|              | 6–10      |                    | 44              | 36              |                     | 44              | 31             |          |
|              | 20        |                    |                 |                 |                     |                 |                | 37       |
| July 2013    | <6        |                    | 34              |                 | 30                  | 38              | 43             |          |
|              | 6–10      |                    | 69              | bd              |                     | 60              | 56             |          |
|              | 20        |                    |                 |                 |                     |                 |                | 73       |

**Table S4.** Pearson correlations between nearbed SRP, DP and TIN concentrations and average values of UVFR, chlorophyll *a* fluorescence (Chl *a*)  $K_{660}$ , depth and temperature (temp) measured from 1m above lakebed to the lakebed in water column profiles collected during sampling events.

|                    | SRP                 |                |                |                |       | DP                  |              |              |               |       | TIN                 |                |                |                |              |
|--------------------|---------------------|----------------|----------------|----------------|-------|---------------------|--------------|--------------|---------------|-------|---------------------|----------------|----------------|----------------|--------------|
|                    | UVFR                | Chl <i>a</i>   | $K_{660}$      | Temp           | Depth | UVFR                | Chl <i>a</i> | $K_{660}$    | Temp          | Depth | UVFR                | Chl <i>a</i>   | $K_{660}$      | Temp           | Depth        |
| Survey (n)         | <i>r</i> -value (p) |                |                |                |       | <i>r</i> -value (p) |              |              |               |       | <i>r</i> -value (p) |                |                |                |              |
| S1 (18)            | -                   | -              | -              | -              | -     | 0.48 (0.04)         | -            | -            | -             | -     | -                   | -              | -              | -              | -            |
| S3 (20)            | -                   | -              | -              | -              | -     | 0.48 (0.04)         | -            | -            | -             | -     | 0.73 (0.002)        | 0.61 (0.004)   | 0.57 (0.008)   | -0.52 (0.018)  | -            |
| S5 (22)            | -                   | -              | -              | -              | -     | -                   | -            | -            | -             | -     | -                   | -              | 0.58 (0.005)   | -              | -0.47 (0.03) |
| S6 (19)            | -                   | -              | -              | -              | -     | -                   | -            | -            | -             | -     | -                   | 0.39 (0.04)    | -              | -0.48 (0.04)   | -            |
| S7 (18)            | -                   | 0.47 (0.04)    | -              | -              | -     | -                   | 0.49 (0.04)  | -            | -             | -     | -                   | -              | -              | -              | -            |
| Summer Months (57) | -                   | -              | -0.27 (0.04)   | -              | -     | -                   | -            | -            | -             | -     | 0.37 (0.005)        | -0.52 (<0.001) | -              | -0.57 (<0.001) | -            |
| All (97)           | -                   | -0.45 (<0.001) | -0.50 (<0.001) | -0.54 (<0.001) | -     | -                   | -0.22 (0.03) | -0.21 (0.04) | -0.22 (<0.03) | -     | 0.24 (0.017)        | -0.67 (<0.001) | -0.52 (<0.001) | -0.75 (<0.001) | -            |

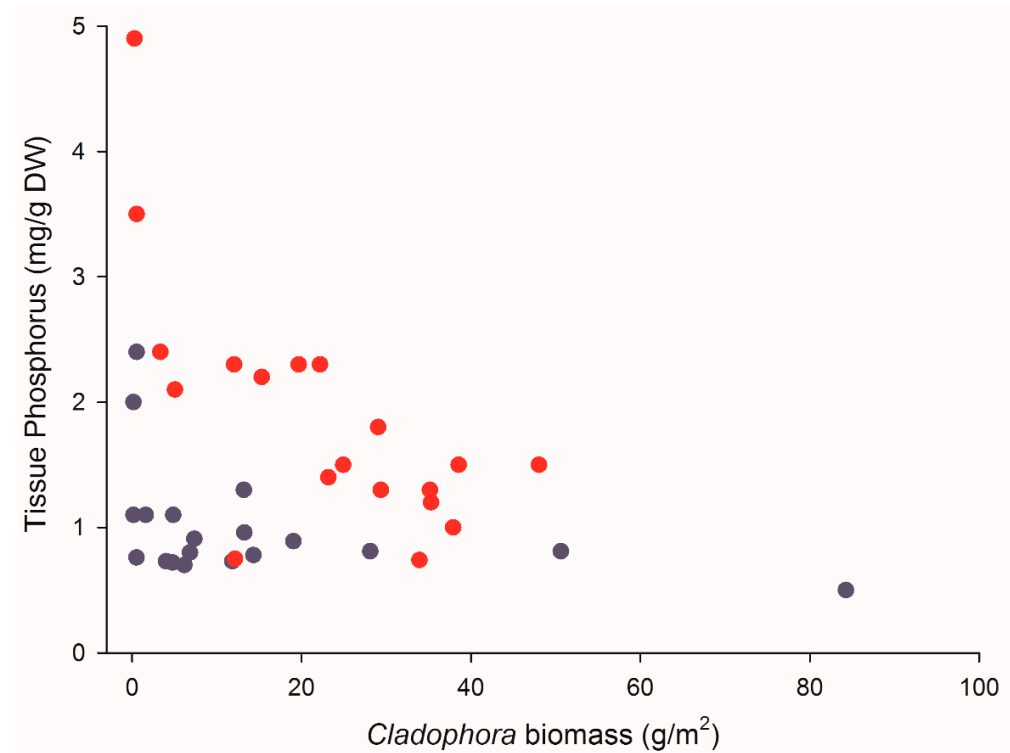

**Figure S1.** *Cladophora* tissue phosphorus plotted against mean *Cladophora* biomass at sites over the Pickering - Ajax study area in 2012. Blue and red symbols indicate the results for the June and August surveys, respectively.

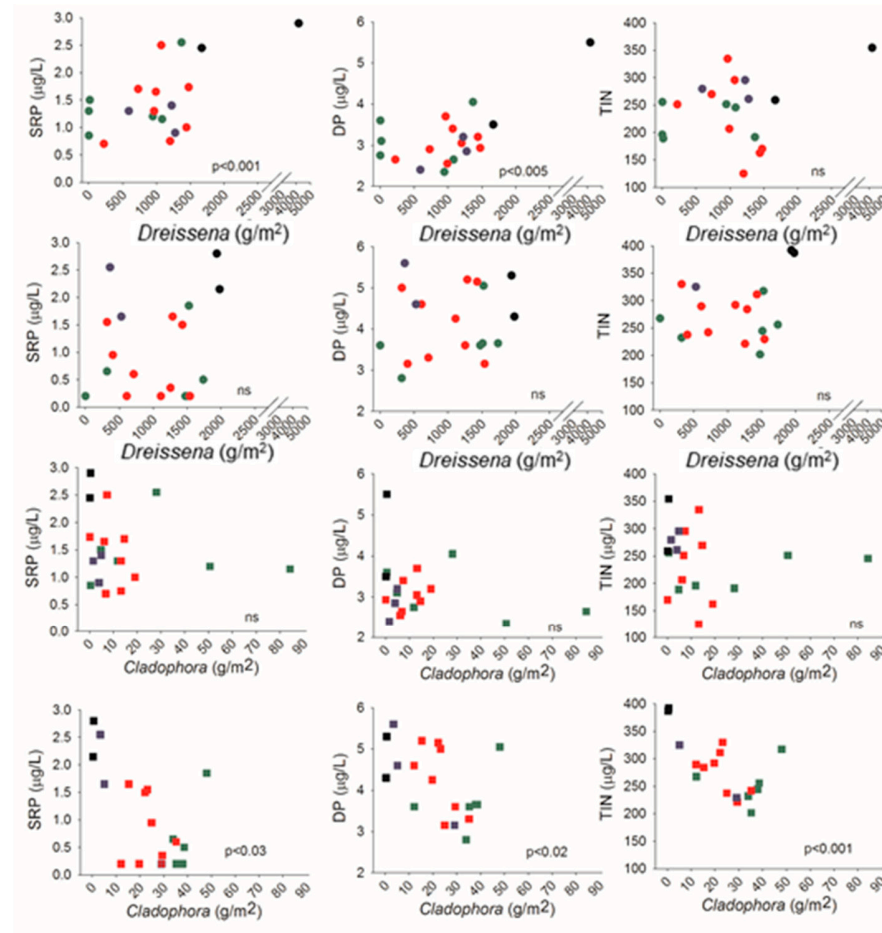

**Figure S2.** *Cladophora* and *Dreissena* biomass plotted against nearbed SRP, DP and TIN for the July and August 2012 benthic surveys. The upper two panels indicate *Dreissena* results for surveys in June and August, respectively, and the lower two panels indicate *Cladophora* results for June and August, respectively. The symbol colour indicates site depth with green, red, blue and black indicating depth ranges of 3 to 5, 5 to 8 to 12 and 18 to 21, respectively. The p- value at the bottom of the plots indicates the level of significance of the Pearson correlation coefficient between variables; ns indicated the p- value is above 0.05.
